1 **Rapid identification of an *Arabidopsis* NLR gene conferring susceptibility to *Sclerotinia***  
2 ***sclerotiorum* using time-resolved automated phenotyping**

3

4 Adelin Barbacci\*, Olivier Navaud, Malick Mbengue, Rémy Vincent, Marielle Barascud, Aline  
5 Lacaze, Sylvain Raffaele\*

6

7 **Authors affiliation :**

8 LIPM, Université de Toulouse, INRA, CNRS, Castanet-Tolosan, France

9

10 **\*Correspondence:** [adelin.barbacci@inra.fr](mailto:adelin.barbacci@inra.fr)

11 [sylvain.raffaele@inra.fr](mailto:sylvain.raffaele@inra.fr)

12

13 **Short title :** A NLR gene for susceptibility to *Sclerotinia*

14

15

16 **Authors' Contributions**

17 A.B., O.N. and S.R. conceived the original screening and research plans; A.B., O.N., M.M and  
18 S.R. supervised the experiments; R.V., M.B and A.L. performed most of the experiments; A.B.  
19 and S.R. designed the experiments and analyzed the data; A.B and S.R. conceived the project  
20 and wrote the article with contributions of all the authors; A.B and S.R. agree to serve as the  
21 authors responsible for contact and ensure communication.

22

23

24 **ABSTRACT**

25 The broad host range necrotrophic fungus *Sclerotinia sclerotiorum* is a devastating pathogen  
26 of many oil and vegetable crops. Plant genes conferring complete resistance against *S.*  
27 *sclerotiorum* have not been reported. Instead, plant populations challenged by *S.*  
28 *sclerotiorum* exhibit a continuum of partial resistance designated as quantitative disease  
29 resistance (QDR). Because of their complex interplay and their small phenotypic effect, the  
30 functional characterization of QDR genes remains limited. How broad host range  
31 necrotrophic fungi manipulate plant programmed cell death is for instance largely unknown.  
32 Here, we designed a time-resolved automated disease phenotyping pipeline and assessed  
33 the kinetics of disease symptoms caused by seven *S. sclerotiorum* isolates on six *A. thaliana*  
34 natural accessions with unprecedented resolution. We hypothesized that large effect  
35 polymorphisms common to the most resistant *A. thaliana* accessions, but absent from the  
36 most susceptible ones, would point towards disease susceptibility genes. This identified  
37 highly divergent alleles of the nucleotide-binding site leucine-rich repeat gene *LAZ5* in the  
38 resistant accessions Rubenzhoe and Lip-0. Two *LAZ5*-deficient mutant lines in the Col-0  
39 genetic background showed enhanced QDR to *S. sclerotiorum*, whereas plants mutated in  
40 the closely related *CSA1* gene responded like the wild type. These findings illustrate the  
41 value of time-resolved image-based phenotyping for unravelling the genetic bases of  
42 complex traits such as QDR. Our results suggest that *S. sclerotiorum* manipulates plant  
43 sphingolipid pathways guarded by *LAZ5* to trigger programmed cell death and cause disease.

44 **KEYWORDS**

45 Quantitative disease resistance, fungal pathogen, *Sclerotinia sclerotiorum*, NBS-LRR, plant  
46 phenotyping

47

## 48 INTRODUCTION

49

50 The fungal pathogen *Sclerotinia sclerotiorum* is the causal agent of *Sclerotinia* stem rot (SSR),  
51 also designated as white mold disease, on numerous crop and vegetable species, including  
52 rapeseed, soybean, sunflower and tomato. *S. sclerotiorum* can be among the most damaging  
53 pathogens of rapeseed and soybean when conditions are favorable (Peltier et al., 2012;  
54 Derbyshire and Denton-Giles, 2016). *S. sclerotiorum* penetrates plant tissues through  
55 wounds, natural openings, or actively forming compound appressoria (Bolton et al., 2006). It  
56 employs a typical necrotrophic strategy to colonize host tissues, rapidly triggering plant cell  
57 death (Kabbage et al., 2015; Mbengue et al., 2016). Adapted cultural practices, the use of  
58 fungicides and biological control methods are frequently employed to limit damages due to  
59 *S. sclerotiorum*, since genetic sources of resistance to SSR are lacking for most crop species  
60 (Derbyshire and Denton-Giles, 2016). Instead of a clear demarcation between resistant and  
61 susceptible genotypes, plants challenged with *S. sclerotiorum* generally show a continuum of  
62 resistance levels designated as quantitative disease resistance (QDR) phenotype (Perchepped  
63 et al., 2010; Roux et al., 2014). The molecular bases of QDR in plants remain largely elusive  
64 (Poland et al., 2009; Roux et al., 2014). Whereas resistance (R) genes mediating complete  
65 disease resistance all belong to the nucleotide-binding site leucine-rich repeat (NLR) family,  
66 genes underlying QDR discovered to date span a broad range of molecular functions (Poland  
67 et al., 2011; Roux et al., 2014; Corwin and Kliebenstein, 2017). Molecular function of genes  
68 associated with QDR include for instance transporters (Krattinger et al., 2009), kinases (Fu et  
69 al., 2009; Huard-Chauveau et al., 2013), peptidases (Poland et al., 2011; Badet et al., 2017b)  
70 or actin-related proteins (Moscou et al., 2011). NLRs (Debieu et al., 2015; Lee et al., 2016)  
71 and signaling components typically associated with R-mediated resistance (Iakovidis et al.,  
72 2016) can also mediate QDR, illustrating the tight integration of QDR and R-mediated  
73 immunity components.

74

75 Because of their complex interplay and their small phenotypic effect, the functional  
76 characterization of QDR genes is challenging. With large collections of mutant lines available,  
77 studies in the model plant *A. thaliana* enable the rapid functional characterization of  
78 individual candidate QDR genes (Huard-Chauveau et al., 2013; Corwin et al., 2016;  
79 Rajarammohan et al., 2018). Fully quantitative readouts are often required to reveal the  
80 contribution of individual *A. thaliana* genes to QDR against *S. sclerotiorum*, such as ethylene  
81 and ROS detection (Perchepped et al., 2010; Zhang et al., 2013), lesion area measurements  
82 and estimation of fungal biomass (Zhang et al., 2013; Badet et al., 2017b). To this end,  
83 quantitative image analysis can be used as a proxy to evaluate disease severity (Baranowski  
84 et al., 2015; Mutka et al., 2016; Badet et al., 2017b; Karisto et al., 2017) and the impact of  
85 stress on plant fitness (Chen et al., 2014; Czedik-Eysenberg et al., 2018; Nelson et al., 2018).  
86 Increasing the accuracy and robustness of such quantitative phenotyping often involves  
87 increasing the number of measurements. This allowed for instance to reveal the role of  
88 individual effectors from the bacterial pathogen *Xanthomonas axonopodis* pv. *manihotis* in

89 virulence (Mutka et al., 2016). High-throughput image-based plant phenotyping proved  
90 valuable in crop breeding and for research purposes (Araus and Cairns, 2014; Fahlgren et al.,  
91 2015; Coppens et al., 2017). There is therefore a need to improve our ability to generate  
92 large datasets of quantitative plant disease measurements at low cost, low footprint and  
93 reduced human intervention (Czedik-Eysenberg et al., 2018). Because it is generally non-  
94 destructive, image-based disease measurement also gives access to the dynamics of disease  
95 progression. This enabled for instance to study the spatial and temporal distribution of  
96 pathogens in plants tissues (Mutka et al., 2016) and distinguish between infected and non-  
97 infected plants long before qualitative symptoms are visible (Czedik-Eysenberg et al., 2018).  
98 In spite of remarkable progress in the methods and technology in recent years, fundamental  
99 advances in plant pathology enabled by automated plant phenotyping are still relatively  
100 limited. For instance, the ability of image-based disease phenotyping methods to identify  
101 novel QDR genes and advance our conceptual understanding of this complex trait remains  
102 elusive.

103

104 Like most pathogens, fungi secrete molecules, often termed “effectors”, to manipulate host  
105 physiology and cause disease (Schornack et al., 2009; Doehlemann et al., 2014; Lo Presti et  
106 al., 2015). Some pathogen effectors are recognized by specific plant R genes, leading to a  
107 rapid and efficient immune response designated as effector-triggered immunity (ETI) (Dodds  
108 and Rathjen, 2010). In some plant-pathogen interactions, plant resistance is triggered only in  
109 plant genotypes carrying an R-gene enabling the specific recognition of an avirulence  
110 effector produced by the pathogen, according to a gene-for-gene model (Flor, 1956).  
111 However, this model rarely applies to plant interactions with necrotrophic pathogens. ETI  
112 often involves the rapid programmed death of host cells at the site of infection, a process  
113 designated as the hypersensitive response (HR) (Mur et al., 2008). Although very efficient to  
114 control the spread of biotrophic pathogens, the HR can instead favor the colonization of  
115 plants by necrotrophic fungi (Govrin and Levine, 2000). A number of necrotrophic fungal  
116 pathogen specialized to infect a few plant species evolved effectors designated as host-  
117 specific toxins (HSTs) that trigger cell death specifically in some plant genotypes (Friesen et  
118 al., 2008; Oliver and Solomon, 2010). Typical HST examples are the victorin peptides  
119 produced by the necrotrophic Victoria Blight fungal pathogen *Cochliobolus victoriae*. Victorin  
120 is critical for *C. victoriae* virulence, which is mediated through the specific recognition by the  
121 plant LOV1 protein belonging to the NLR class (Lorang et al., 2007). Functional and structural  
122 analyses of LOV1 suggest that it corresponds to a typical R gene that has been hijacked by *C.*  
123 *victoriae* to trigger cell death and facilitate infection (Lorang et al., 2012; Wolpert and Lorang,  
124 2016). The wheat *Tsn1* gene belongs to the NLR class and recognizes the ToxA peptide  
125 produced by the necrotrophic fungus *Stagonospora nodorum*, conferring effector triggered  
126 susceptibility (ETS) to this pathogen (Faris et al., 2010). Another effector produced by *S.*  
127 *nodorum*, SnTox1, triggers programmed cell death when recognized by the wheat gene *Snn1*  
128 encoding a wall-associated kinase (WAK) (Liu et al., 2012; Shi et al., 2016). WAKs contribute  
129 to resistance against biotrophic and hemibiotrophic fungal pathogens (Hurni et al., 2015;

130 Zuo et al., 2015) providing another example of a biotrophic pathogen defense mechanism  
131 hijacked by a specialized necrotrophic fungus. Our knowledge on whether and how broad  
132 host range necrotrophic fungi manipulate plant programmed cell death remains  
133 nevertheless limited.

134

135 The analysis of HR-deficient *Arabidopsis thaliana* mutants suggested that the broad host  
136 range necrotrophic fungi *S. sclerotiorum* and *Botrytis cinerea* can benefit from HR cell death  
137 (Govrin and Levine, 2000). Similarly, inactivation of the BIK1 kinase enhances *A. thaliana*  
138 resistance to avirulent bacterial pathogens but increases susceptibility to *B. cinerea* and  
139 *Alternaria brassicicola* (Veronese et al., 2006). Several molecules secreted by broad host  
140 range necrotrophic fungi trigger cell death in plants. Examples include *B. cinerea* endo-  
141 arabinase BcAra1 (Nafisi et al., 2014), xyloglucanase BcXYG1 (Zhu et al., 2017), the *S.*  
142 *sclerotiorum* necrosis and ethylene inducing peptide SsNEP1 (Dallal Bashi et al., 2010) or  
143 *Alternaria tenuissima* Hrip1 protein elicitor (Kulye et al., 2012). Cell death induction by these  
144 elicitors is often due to direct toxic effects on plant cells independently of the manipulation  
145 of plant programmed cell death (Lenarčič et al., 2017). Conversely, the *A. thaliana* aspartyl  
146 protease APCB1 cleaves the BAG6 cochaperone, triggering autophagy and restricting *B.*  
147 *cinerea* colonization (Li et al., 2016). This findings points towards a role for autophagy cell  
148 death in resistance to necrotrophic fungi (Lai et al., 2011; Lenz et al., 2011) and highlight the  
149 complex role of plant programmed cell death in the interaction with necrotrophic pathogens.  
150 Evidence for broad host range necrotrophic fungi exploiting cell death induced by typical  
151 plant R genes has not been reported to date.

152

153 In this work, we show that the *A. thaliana* NLR gene *LAZ5* (At5g44870), but not its close  
154 relative *CSA1*, confers susceptibility to *S. sclerotiorum*. For this, we designed a real-time  
155 automated disease phenotyping tool and precisely assessed the kinetics of disease caused  
156 by seven *S. sclerotiorum* strains on six *A. thaliana* natural accessions. We found that the  
157 speed of lesion growth was highly dependent on the host plant genotype and a good  
158 indicator of QDR level. We hypothesized that large effect polymorphisms common to the  
159 two most resistant *A. thaliana* accessions, but absent from the four other accessions, would  
160 point towards disease susceptibility genes. We identified highly divergent alleles of *LAZ5* in  
161 the resistant accessions Rubenzhoe and Lip-0, while identical alleles existed in the other *A.*  
162 *thaliana* accessions analyzed. As expected, two *LAZ5*-deficient mutant lines in the Col-0  
163 genetic background showed enhanced QDR to *S. sclerotiorum*, whereas plants mutated in  
164 the closely related *CSA1* gene responded like the wild type. Considering that the ectopic  
165 activation of *LAZ5* triggers cell death (Palma et al., 2010), our results suggest that the broad  
166 host range necrotrophic fungus *S. sclerotiorum* exploits this R-gene induced plant cell death  
167 to its benefit.

168

169 **RESULTS**

170 **Quantification of disease resistance to *S. sclerotiorum* by automated real-time image**  
171 **analysis**

172 To generate massive, quantitative and kinetic measurements of disease caused by *S.*  
173 *sclerotiorum*, we designed mobile imaging cabinets (Navigable automatized phytotron,  
174 Navautron) and the associated automatized image analysis pipeline for detached leaves (**Fig.**  
175 **1A**). A single Navautron allows imaging simultaneously up to 24 whole *A. thaliana* plants or  
176 120 detached *A. thaliana* leaves. A typical phenotyping session of detached leaves  
177 inoculated by *S. sclerotiorum* involves automated imaging every 10 minutes over three days,  
178 the automated recognition of disease lesions on individual leaves, yielding a total of  $>10^6$   
179 lesion measurements with almost no human intervention.

180 We quantified the area of necrotic lesions caused by seven isolates of *S. sclerotiorum* (Badet  
181 et al., 2017a) on detached leaves from six natural accessions of *A. thaliana* (**Fig. 1B**). We  
182 distinguished three major phases along the kinetics of lesions development: (i) a latency  
183 phase, during which no necrotic lesion was detected, (ii) a spreading phase, during which the  
184 area of necrotic lesions grew exponentially, and (iii) an asymptotic phase, when lesions have  
185 reached the border of leaves (**Fig. 1C**). The overall kinetics are therefore depicted by a  
186 logistic function. The asymptotic phase was dependent only on leaf size and did not provide  
187 information on disease progression. In the 42 interactions tested, the duration of the latency  
188 phase and the speed of lesion size increase during the spreading phase were independent  
189 ( $R^2 = 0.07$ ). The duration of the latency phase was mainly dependent on *S. sclerotiorum*  
190 genotype ( $p=1.2 \cdot 10^{-21}$ ) with a significant but weaker effect of plant genotype ( $p=2.95 \cdot 10^{-4}$ ).  
191 This suggested that the latency phase was primarily determined by fungal strains virulence.  
192 Although exponential, the spreading phase can be approximated classically by a linear  
193 function through Taylor development at first order. The disease lesion doubling time (LDT, in  
194 minutes) is deduced from the slope of the lesion size curve during the spreading phase. The  
195 LDT is the characteristic value for the infection since it is sufficient to characterize  
196 completely the spreading phase. Of practical importance, the LDT is not dependent on the  
197 zoom factor of the cameras used to image symptoms. By contrast with latency,  $\log(\text{LDT})$  was  
198 mostly dependent on the *A. thaliana* genotype ( $p=7.16 \cdot 10^{-37}$ ) and weakly function of *S.*  
199 *sclerotiorum* isolates ( $p=2.39 \cdot 10^{-3}$ ). We conclude that the  $\log(\text{LDT})$  provides an appropriate  
200 measure of quantitative disease resistance (QDR) to *S. sclerotiorum*.

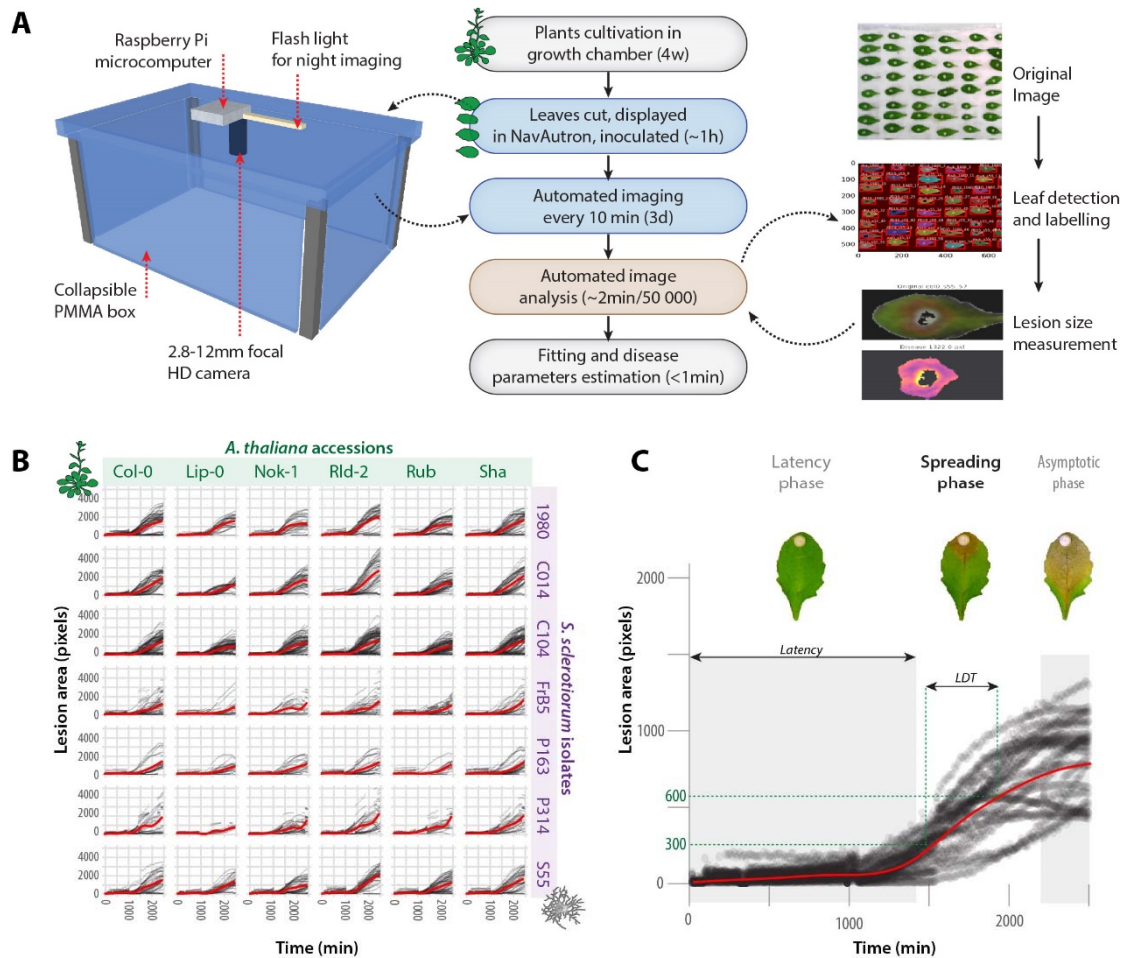

201

**Figure 1. Analysis of quantitative disease resistance (QDR) against *S. sclerotiorum* with the Navatron system.** (A) Overview of the Navatron setup and the pipeline for QDR analysis. Left: Each Navatron consist in a transparent plastic box equipped with a Raspberry Pi microcomputer, a HD camera and a LED flash light. Center: pipeline describing the experiments reported in this manuscript, detached leaves were analyzed with the Navatron through automated imaging, automated image analysis, curve fitting and QDR parameters estimation. The major steps of the automated image analysis are shown on the right. D, days; HD, high definition; PMMA, Poly(methyl methacrylate); w, weeks. (B) Kinetics of disease lesion development for 42 different combinations of *A. thaliana* natural accessions (columns) and *S. sclerotiorum* isolates (lines). Red curves show smooth fitting curves for 1,500 to 12,250 measurements. (C) Typical kinetics of *S. sclerotiorum* disease lesion development on *A. thaliana*, illustrating the latency phase, spreading phase and asymptotic phase. Characteristic values are the duration of latency phase, dependent on the fungal genotype, and the lesion doubling time (LDT) dependent on the plant genotype.

202

### Grouping of plant and fungal genotypes according to QDR phenotypes

203

Necrotic disease lesions were detected after a latency phase of 1 to 1.5 days in average, mostly determined by *S. sclerotiorum* genotypes. Post hoc pairwise t tests with Benjamini-Hochberg p-value correction (Benjamini and Hochberg, 1995) revealed four groups of *S. sclerotiorum* isolates with distinct latency phases (Fig. 2A). Isolates 1980 and p314 had the shorter latency phase (average 22.6 and 23.2 hours), isolates FrB5 and C014 had an intermediate latency phase (average 24.4 and 25.5 hours), isolates C104 and S55 had a

208

209 longer latency phase (average 26.4 and 26.7 hours) and isolate P163 had the longest latency  
210 phase (29.8 hours). The smallest significant difference in latency phase that could be  
211 detected in this experiment was about 1h. The ranking of isolates according to their latency  
212 phase was identical on all *A. thaliana* accession and therefore not dependent on the plant  
213 genotype.

214 The average LDT ranged between 3.08 and 4.24 hours, corresponding to  $\log(\text{LDT})$  of 5.22 to  
215 5.54 (**Fig 2.B**), mostly determined by *A. thaliana* genotypes. Post hoc pairwise t tests with  
216 Benjamini-Hochberg p-value correction (Benjamini and Hochberg, 1995) revealed three  
217 groups of resistance (**Fig. 2B**). With an average  $\log(\text{LDT})$  5.55 and 5.51, Lip-0 and Rubezhnoe  
218 (Rub) accessions were substantially more resistant than Nok-1, Col-0 and Shahdara (Sha)  
219 (average  $\log(\text{LDT})$  5.40, 5.30 and 5.30 respectively), whereas Rld-2 exhibited the highest  
220 susceptibility to any *S. sclerotiorum* strain tested (average  $\log(\text{LDT})$  5.23). The smallest  
221 significant difference in LDT that could possibly be detected in this experiment was 13.3 min  
222 ( $\log=0.069$ ). The ranking of *A. thaliana* accessions according to LDT was identical with all *S.*  
223 *sclerotiorum* genotypes. Although the precise ranking of accessions based on LDT differs  
224 from the ranking obtained previously with disease severity index on whole plants with *S.*  
225 *sclerotiorum* strains S55 (Perchepped et al., 2010) and 1980 (Badet et al., 2017b), we  
226 consistently found Lip-0 and Rub among the most resistant accessions and Rld-2 among the  
227 most susceptible ones.

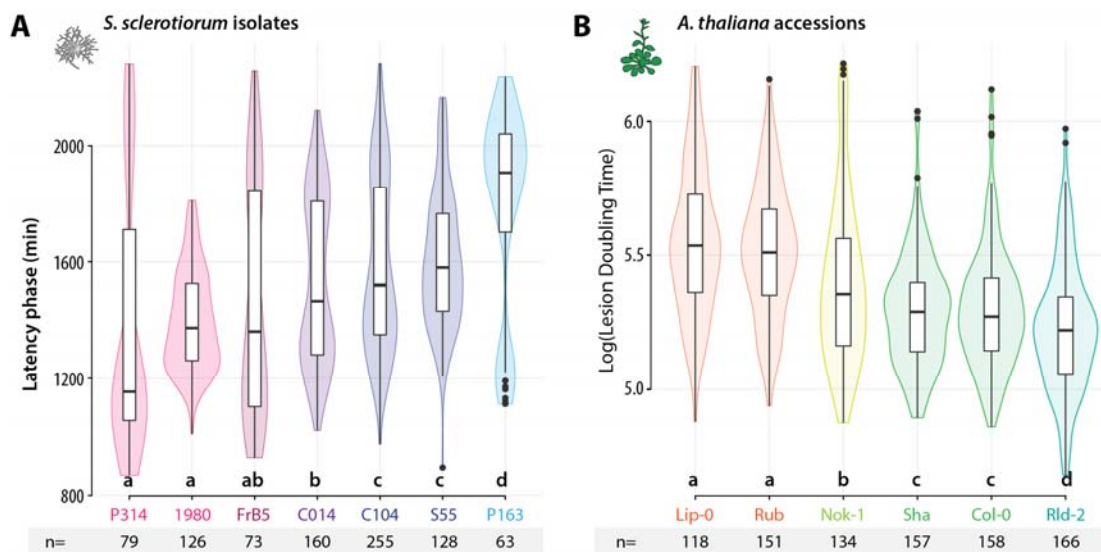

228  
229  
**Figure 2. Characteristic values describing disease symptom dynamics in the interaction between seven *S. sclerotiorum* isolates and six *A. thaliana* accessions. (A)** The duration of latency phase (Y-axis) was mostly dependent on *S. sclerotiorum* isolates (X-axis), ranked from the most (P314) to the least virulent (P163). Duration of the latency phase was measured n=63 to 255 times for each isolate. **(B)** The lesion doubling time (LDT, Y-axis) was mostly dependent on *A. thaliana* accessions (X-axis), ranked from the most (Lip-0) to the least resistant (Rld-2). LDT was measured n=118 to 158 times on each accession. Letters and colors indicate groups of significance determined by post hoc pairwise t tests.



230 **Identification of candidate susceptibility genes in *A. thaliana* by an association approach**

231 We hypothesized that enhanced QDR in Lip-0 and Rub accessions could result from  
232 disruptive mutations in susceptibility genes. To rapidly pinpoint such candidate susceptibility  
233 genes, we screened the genome of *A. thaliana* for genes harboring non synonymous  
234 mutations both in Lip-0 and Rub accessions but not in any of the other four accessions  
235 analyzed (Nok-1, Col-0, Sha and Rld-2) (**Fig. 3A**). For this, we screened 213,624 positions  
236 genotyped in the six *A. thaliana* accessions selected (Atwell et al., 2010). We found a total  
237 57,716 single nucleotide polymorphisms (SNPs) present both in Lip-0 and Rub, among which  
238 2,312 were not found in Nok-1, Rld-2 or Sha (unique to Rub and Lip-0). Among those, 298  
239 were non-synonymous SNPs unique to Lip-0 and Rub. The density of non-synonymous SNPs  
240 specific to Lip-0 and Rub accessions per gene followed an exponentially decreasing  
241 distribution (**Fig. 3B**). Three genes harbored at least four non-synonymous SNPs in Lip-0 and  
242 Rub but not any non synonymous SNP in Nok-1, Sha or Rld-2 (**Fig. 3C, Table 1**). This includes  
243 *AT1G23935*, encoding an uncharacterized protein with similarity to apoptosis inhibitory  
244 proteins, *AT2G33090*, encoding an uncharacterized member of the transcription elongation  
245 factor IIS family, and *AT5G44870* encoding *LAZ5*, a disease resistance protein of the TIR-NBS-  
246 LRR (NLR) family with similarity to *RPS4* and *CSA1* (Palma et al., 2010). The five non-  
247 synonymous SNPs present in the dataset from (Atwell et al., 2010) resided in the NB and the  
248 LRR domain of *LAZ5* (**Fig. 4A**). Two additional non-synonymous SNPs are present in the Lip-0  
249 allele of *LAZ5* according to data from <http://signal.salk.edu/atg1001/> while the Rub allele  
250 harbors large deletions. In a suppressor screen, single point mutations in *LAZ5* resulted in a  
251 dominant negative phenotype (Palma et al., 2010), suggesting that Lip-0 and Rub alleles of  
252 *LAZ5* could have diverged functionally from their Col-0 counterpart. *LAZ5* is expressed and  
253 induced 2.32 fold during the infection of *A. thaliana* by *S. sclerotiorum* (Badet et al., 2017b),  
254 and was given the highest priority for functional validation.

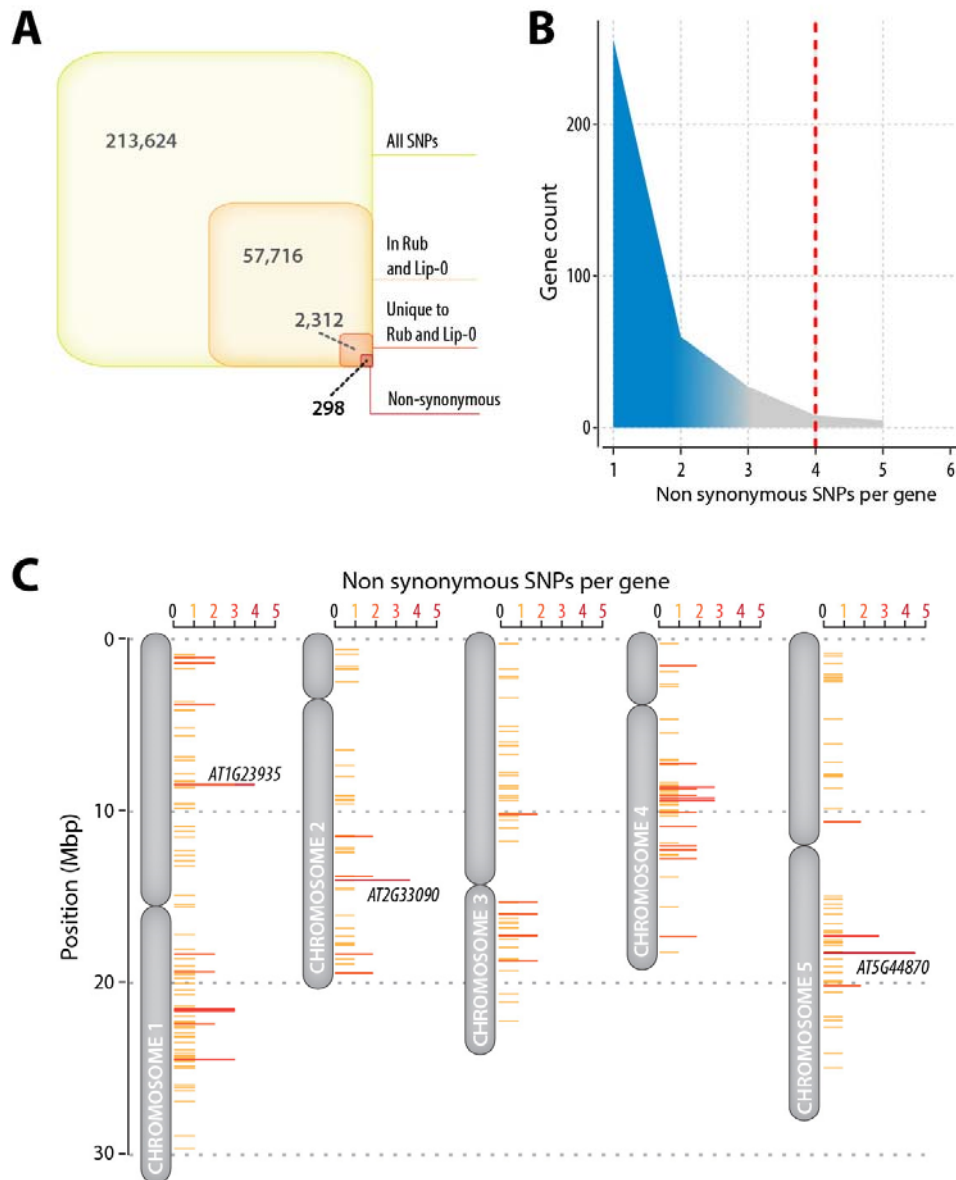

255

256 **Figure 3. Distribution of single nucleotide polymorphisms (SNPs) in selected *A. thaliana* accessions and**  
 257 **identification of candidate disease-relevant genes. (A)** Distribution of SNPs genotyped by (Atwell et al., 2010)  
 258 through our pipeline for finding candidate disease-relevant genes. There were 2,312 SNPs common to Lip-0 and  
 259 Rub but not present in Nok-1, Rld-2 and Sha, among which 298 were non-synonymous SNPs. **(B)** Number of non-  
 260 non-synonymous SNP per gene in the list of 298 genes identified in (A). We report on the three genes including at  
 261 least 4 non-synonymous SNPs in Lip-0 and Rub but no SNP in Nok-1, Rld-2 and Sha (red dotted line). **(C)** Map of *A.*  
 262 *thaliana* chromosomes showing genes with non-synonymous SNPs in Lip-0 and Rub but no SNP in Nok-1, Rld-2  
 263 and Sha. Genes discussed in the text are labeled on the figure.

264

265 **Table 1. List of genes harboring at last four non synonymous SNPs in Lip-0 and Rub but none in Nok-1, Sha and**  
 266 **Rld2.** Chr., chromosome; pos. position; LFC, Log<sub>2</sub> fold gene of gene expression upon inoculation by *S.*  
 267 *sclerotiorum*, with the adjusted p-value for differential expression (NA, not applicable).

| Gene id   | Description                                                  | Chr. | SNP pos. | From | to | SNP type | Gene LFC |
|-----------|--------------------------------------------------------------|------|----------|------|----|----------|----------|
| AT1G23935 | Apoptosis inhibitory protein                                 | 1    | 8462159  | C    | G  | not_syn  | 3.93     |
|           |                                                              | 1    | 8462342  | C    | G  | not_syn  | P=0      |
|           |                                                              | 1    | 8463263  | T    | C  | not_syn  |          |
|           |                                                              | 1    | 8465002  | G    | A  | not_syn  |          |
| AT2G33090 | Transcription elongation factor (TFIIS) family protein       | 2    | 14035515 | C    | G  | not_syn  | 2.97     |
|           |                                                              | 2    | 14035545 | G    | T  | not_syn  | P=NA     |
|           |                                                              | 2    | 14035721 | C    | G  | not_syn  |          |
|           |                                                              | 2    | 14035944 | C    | G  | not_syn  |          |
| AT5G44870 | Disease resistance protein (TIR-NBS-LRR class) family (LAZ5) | 5    | 18115125 | T    | C  | not_syn  | 1.21     |
|           |                                                              | 5    | 18115243 | A    | G  | not_syn  | P=0      |
|           |                                                              | 5    | 18116419 | C    | G  | not_syn  |          |
|           |                                                              | 5    | 18116946 | A    | G  | not_syn  |          |
|           |                                                              | 5    | 18118097 | T    | A  | not_syn  |          |

268

### 269 **Disruption of *LAZ5* increases quantitative resistance to *S. sclerotiorum***

270 To test for a role of *LAZ5* as a susceptibility gene against *S. sclerotiorum*, we analyzed the  
271 phenotype of two *LAZ5* insertion mutant lines in the Col-0 background during infection with  
272 *S. sclerotiorum* 1980. The *laz5-1* null mutant (SALK\_087262C) carries a t-DNA insertion in the  
273 second exon of *LAZ5* and shows dominant suppression of autoimmune cell death in an  
274 *acd11-2* background (Palma et al., 2010). The *laz5-3* mutant (SALK\_068316) carries a t-DNA  
275 insertion ~300bp upstream of *LAZ5* start codon (**Fig. 4A**). Using our Navatron system, we  
276 also determined the resistance to *S. sclerotiorum* in *csa1-2* mutant plants defective in  
277 *AT5G17880*, a TIR-NBS-LRR gene closely related to *LAZ5* (Faigón-Soverna et al., 2006). As  
278 opposed to *laz5-1*, the *csa1-2* mutant showed enhanced susceptibility to avirulent strains of  
279 the bacterial pathogen *Pseudomonas syringae* (Faigón-Soverna et al., 2006; Palma et al.,  
280 2010). Consistent with our previous measurements (**Fig 2**), the average Log(LDT) was 5.35 on  
281 Col-0, similar to the Log(LDT) on the *csa1-2* mutant (Student's t-test p-value= 0.68) (**Fig 4B**).  
282 The *laz5-1* and *laz5-3* mutants had an average Log(LDT) of 5.5 and 5.44, significantly higher  
283 than Col-0 (p-value=  $1.3e^{-05}$  and 0.01 respectively). This represented a 16% gain of  
284 quantitative disease resistance in the *laz5* mutants compared to wild type. The automated  
285 analysis of 74 to 104 plants per genotype thanks to the Navatron setup allowed assessing  
286 this quantitative variation robustly. In agreement with our previous measurements (**Fig 2**),  
287 the Lip-0 accession showed an average Log<sub>10</sub>(LDT) of 5.7, significantly higher than the *laz5*  
288 mutants (p-value =  $3.0e^{-07}$  and  $1.6e^{-10}$ ). We conclude that disruption of the *LAZ5* gene  
289 contributes to the enhanced quantitative disease resistance against *S. sclerotiorum*  
290 measured in Lip-0 and Rub accessions compared to Col-0. This identifies *LAZ5* as a TIR-NBS-  
291 LRR gene conferring susceptibility to *S. sclerotiorum* through its Col-0 allele.

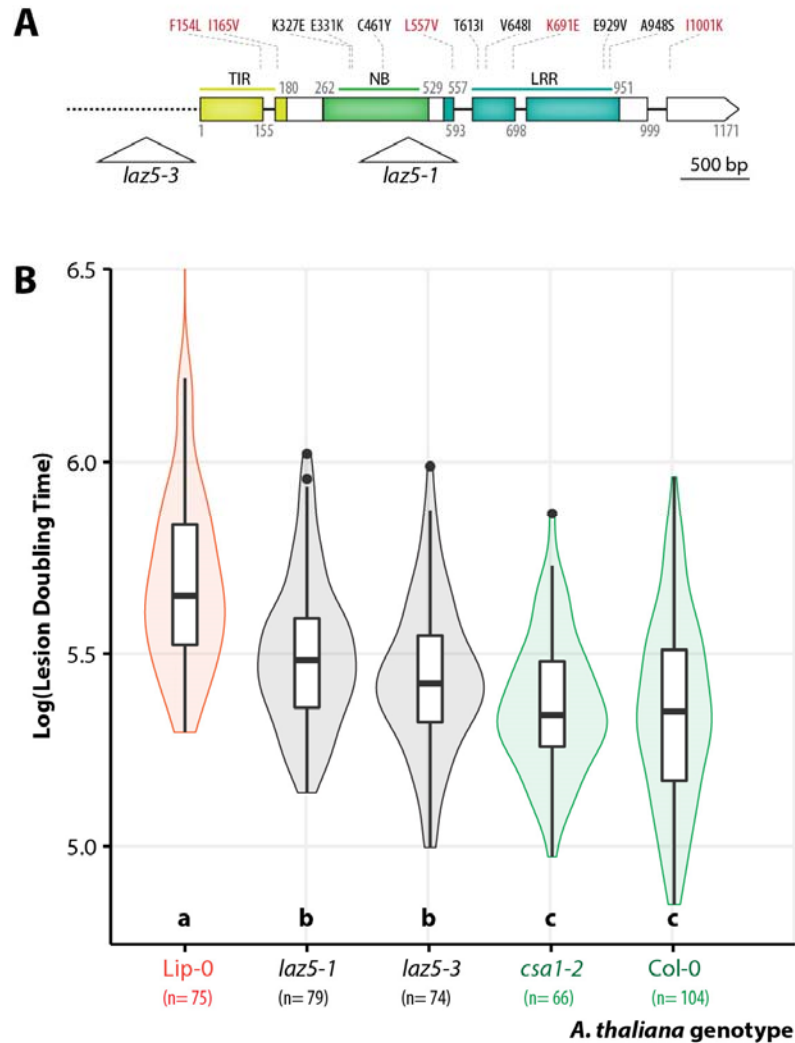

292

293 **Figure 4. Disruption of the NLR gene LAZ5 reduces lesion doubling time upon *S. sclerotiorum* challenge. (A)**  
 294 Schematic map of the *LAZ5* gene showing the position of T-DNA insertion in the *laz5-1* and *laz5-3* mutant lines  
 295 (triangles). Exons are shown as boxes, introns as plain lines, upstream non coding region as a dotted line.  
 296 Domains encoded by exons are color-coded and labeled TIR, NB and LRR. Positions are given as amino acid  
 297 numbers. Non-synonymous mutations known in Lip-0 allele are indicated above boxes, in red when present in  
 298 (Atwell et al., 2010), in black otherwise. **(B)** Lesion doubling time (LDT, Y-axis) in the most resistant accession Lip-  
 299 0, two *laz5* mutant lines, the *csa1-2* mutant, and Col-0 wild type. LDT was measured n=74 to 104 times on each  
 300 accession. Letters and colors indicate groups of significance determined by post hoc pairwise t tests.

301

## 302 Discussion

303 Quantitative disease resistance is a complex trait governed by multiple genes of small to  
 304 moderate effect (Poland et al., 2009; Roux et al., 2014; Corwin and Kliebenstein, 2017).  
 305 Revealing the phenotypic contribution of such small-effect genes challenges our ability to  
 306 quantify precisely and robustly the level of QDR in diverse plant genotypes. In *Botrytis*  
 307 *cinerea* interaction with *A. thaliana*, most plant genes were associated with QDR against a

308 specific *B. cinerea* isolate (Corwin et al., 2016), emphasizing pathogen genetic diversity as a  
309 determinant of QDR phenotype. Previous studies used disease index (Perchepped et al., 2010;  
310 Rajarammohan et al., 2018), ethylene production (Zhang et al., 2013), camalexin production  
311 (Corwin et al., 2016) and lesion area (Corwin et al., 2016; Badet et al., 2017b) to quantify  
312 QDR against necrotrophic fungi in natural accessions and mutants of *A. thaliana*. Here we  
313 chose lesion area measurement to assess QDR for being (i) a continuous parameter (by  
314 contrast to discrete disease indices), (ii) non-destructive and therefore giving access to  
315 disease kinetics, and (iii) amenable to automated image-based measurement, opening the  
316 way to user-independent high-throughput quantification. For the experiments reported in  
317 this manuscript, we conducted *S. sclerotiorum* inoculations and QDR measurement on *A.*  
318 *thaliana* detached leaves to reach 120 samples analyzed with a single Navatron cabinet.  
319 This approach does not provide a complete characterization of plant QDR as discrepancies  
320 may exist between detached-leaves and whole plant disease resistance (Liu et al., 2007),  
321 lesion area may differ from area colonized by the fungus (Kabbage et al., 2015). This could  
322 explain differences in the ranking of *A. thaliana* accessions according to resistance between  
323 this study and (Perchepped et al., 2010). Our Navatron pipeline gives access to the kinetics  
324 of symptoms development during plant-fungal pathogen interactions, which offers several  
325 advantages over single end-point measurements. First, it allows uncoupling lesion doubling  
326 time (LDT) and latency duration. Since latency appeared mostly independent from plant  
327 genotype in our analysis, LDT provides a more direct measurement of plant QDR potential  
328 than end-point measurements. This approach would allow untangling plant and pathogen  
329 genetic factors contributing to quantitative immunity (Corwin et al., 2016). Second, the  
330 resolution and data richness offered by real time image-based phenotyping allows detecting  
331 small phenotypic effects that are not accessible to classical approaches, revealing for  
332 instance the virulence function of single pathogen effectors (Mutka et al., 2016). Here we  
333 could detect robustly variations as small as 1h (about 3.9%) in latency period and 12 minutes  
334 (about 5.24%) in LDT. Finally, LDT is independent of leaf shape and size and allows  
335 comparison of QDR in plants with contrasted leaf architectures. In this initial study, *A.*  
336 *thaliana* accessions ranked identically for their LDT against seven *S. sclerotiorum* isolates,  
337 arguing against specific plant-pathogen genotype interactions below the species level.  
338 Previous studies reported genetic determinants of plant QDR specific of pathogen genotypes  
339 (i.e evidence for “pathotypes”) in the interaction of *B. cinerea* with *A. thaliana* interaction  
340 (Corwin et al., 2016) and *S. sclerotiorum* with *Brassica napus* and *B. juncea* (Ge et al., 2012;  
341 Barbetti et al., 2014). These pathotypes may result from the combined effect of fungal  
342 genetic determinants of latency duration and plant determinants of LDT. Future experiments  
343 will expand the diversity of *S. sclerotiorum* isolates and *A. thaliana* accessions screened by  
344 real time phenotyping to search for specific plant x pathogen interactions affecting LDT.

345 Time-resolved image-based phenotyping with the Navatron system allowed identifying  
346 *LAZ5* as a susceptibility gene to *S. sclerotiorum*. *LAZ5* belongs to the TIR-NBS-LRR family and  
347 is required for *ACD11*-mediated cell death (Palma et al., 2010). Overexpression of *LAZ5*  
348 results in hypersensitive cell death, while *LAZ5* mutant alleles suppress the autoimmune

349 phenotype of *acd11* mutants (Palma et al., 2010). To our knowledge, this analysis provides  
350 with *LAZ5* the first example of a TIR-NBS-LRR gene controlling susceptibility to a broad host  
351 range necrotrophic fungus. Whether effector molecules secreted by *S. sclerotiorum* interfere  
352 directly or indirectly with *LAZ5* function remains to be determined. Testing for enhanced  
353 resistance of *laz5* mutants to diverse *S. sclerotiorum* isolates and necrotrophic fungal species  
354 should be a promising future direction to address this question.

355 Broad host range fungal pathogen invest a substantial fraction of their cellular energy in  
356 secreted proteins to counter plant defenses and extract nutrients from plant cells (Badet et  
357 al., 2017a). Manipulation of the *LAZ5* pathway may be part of *S. sclerotiorum* strategy to  
358 actively trigger plant cell death. Autoimmune mutants such as *acd11* were proposed to be  
359 altered in functions guarded by NB-LRR genes such as *LAZ5* (Palma et al., 2010; Tong et al.,  
360 2017). *ACD11* encodes a ceramide-1-phosphate transfer protein, which led to the hypothesis  
361 that *LAZ5* could guard sphingolipid metabolic pathways targeted by pathogen effectors  
362 (Simanshu et al., 2014). Necrosis and ethylene-inducing peptide 1-like (NLP) are toxins  
363 secreted by diverse plant pathogens that target plant sphingolipids (Lenarčič et al., 2017). *S.*  
364 *sclerotiorum* produces NLPs (Dallal Bashi et al., 2010) the activity of which could be guarded  
365 by *LAZ5*. *A. thaliana* mutants in the dihydrosphingosine-1-phosphate lyase AtDLP1 are more  
366 resistant to *B. cinerea* (Magnin-Robert et al., 2015) supporting the view that sphingolipids  
367 are important mediators of QDR against necrotrophic fungi. Alternatively, *LAZ5* activity could  
368 be costly for plants so that the inactivation of this gene would be beneficial even in the  
369 absence of pathogen. However, we did not detect growth defects in *laz5* mutants, arguing  
370 against this hypothesis. The similar LDT measured in *csa1-2* and wild type plants upon *S.*  
371 *sclerotiorum* inoculation also pleads for a relatively specific role of *LAZ5* in QDR against this  
372 fungus. *CSA1* and *RPS4* are two TIR-NBS-LRR genes closely related to *LAZ5* that confer  
373 resistance to avirulent strains of the bacterial pathogen *Pseudomonas syringae* (Gassmann  
374 et al., 1999; Faigón-Soverna et al., 2006), whereas *LAZ5* does not (Palma et al., 2010),  
375 supporting *LAZ5* specific function.

376 Inactivation of *LAZ5* contributed ~30% of the reduced LDT in Lip-0 accession, indicating that  
377 Lip-0 harbors other genetic variants positively affecting QDR. Lip-0 also shows high QDR  
378 against *B. cinerea*, *Plectosphaerella cucumerina* and *Fusarium oxysporum* (Llorente et al.,  
379 2005), making it a useful natural resource for studying the determinants of QDR. The  
380 Navatron system is flexible allowing for variations and improvements. Future experiments  
381 will include imaging whole plants to detect putative spatial bottlenecks to disease  
382 progression, age-related factors associated with QDR and tradeoffs between QDR and plant  
383 growth.

384

## 385 MATERIAL AND METHODS

386 **Plant material and cultivation.** Six natural accessions of *A. thaliana* were chosen to cover

387 the range of resistance to *S. sclerotiorum* (Perchepped et al., 2010): Lip-0 (CS76542; ecotype  
388 ID: 8325), Rubenzhnoe-1 (CS76594; 7323), Nok-1 (CS78282; 7270), Shahdara (CS78397;  
389 6962), Col-0 (CS76778; 6909), Rld2 (CS78349; 7457). Plants were grown at 22°C, 9 hours light  
390 period at 120 µmol/m<sup>2</sup>/s during 4 weeks before inoculation. Arabidopsis insertion mutant  
391 lines in the Col-0 background were obtained from the Nottingham Arabidopsis Stock Centre  
392 (NASC). Mutant lines in *LAZ5* (*AT5G44870*) were SALK\_087262C (*laz5-1*) and SALK\_068316  
393 (*laz5-3*), the *csa1-2* mutant line was SALK\_057697C. Homozygous T-DNA insertion was  
394 verified by PCR for each line following recommendations from the NASC website.

395

396 **Fungal cultivation and inoculation.** The seven isolates of *S. sclerotiorum* used in this work  
397 are described in (Badet et al., 2017a). Four isolates (C014, C104, P314, P163) were obtained  
398 from a rapeseed field population collected in Blois (France) in 2010, isolate FrB5 was  
399 obtained from (Vleugels et al., 2013), isolate S55 was obtained from (Perchepped et al.,  
400 2010) and isolate 1980 is *S. sclerotiorum* reference strain (Derbyshire et al., 2017). *S.*  
401 *sclerotiorum* isolates were grown on Potato Dextrose Agar (PDA) plates for 5 days at 23°C in  
402 the dark prior inoculation. 240 combinations of *A. thaliana* accessions and *S. sclerotiorum*  
403 isolates were distributed in two Navautrons in a fully randomized design. Leafs were cut  
404 with a scalpel blade at the time of inoculation, placed adaxial face up on wet paper towel  
405 overlaid at the bottom of Navautrons. Inoculations were performed as described in (Badet et  
406 al., 2017b), using PDA plugs of 5mm diameter colonized by the fungus placed upside down  
407 on the adaxial surface of leaves (mycelium in contact with the leaf). The experiment was  
408 repeated three times independently and results from the three replicates were combined  
409 for analysis. Statistical analyses were performed using R software and the ‘car’ library for  
410 type II ANOVA and pairwise t test with Benjamini and Hochberg p-value correction  
411 (Benjamini and Hochberg, 1995; R Core Team, 2014). Distributions of LDT were normalized  
412 by log transformation. Plots were made using the ‘ggplot2’ library (Wickham, 2010).

413

414 **Design of the Navautron phenotyping cabinets.** Five mm-wide PMMA plates were cut on a  
415 Trotec Speedy 500 Laser cutting machine according to plans provided as **Supplementary file**  
416 **1**. Holes were drilled at the center of the upper panel to place full HD 1080p USB cameras  
417 with 2.8-12mm focal length (model ELP-USBFHD05MT-FV-F1 manufactured by ELP, China).  
418 The cameras were plugged to Raspberry Pi 3 Model B motherboards equipped with  
419 Waveshare 3.2 inch TFT touchscreens. Autofocus and automatic white balance were  
420 disabled. For each experiment, pictures were taken every 10 minutes during 4 days and  
421 stored on SD cards. During nighttime, a LED flash light is turned on during 5 seconds for  
422 image acquisition. Navautrons were placed in Percival AR-41L2 growth chambers at 22°C  
423 with ~90% humidity under 9h light period.

424 **Image analysis pipeline.** The area of necrotic disease lesions was computed by numeric  
425 method for each individual leaf at each time point. We designed is a thresholding method  
426 based on color analysis using the scikit-image python image analysis toolbox (van der Walt  
427 et al., 2014). The method splits images of an infected leaf into three layers corresponding to  
428 the background, the lesion and the leaf. The ‘background’ corresponded to pixels with a  
429 saturation value superior or equal to 0.3 in HSV color space. The lesion corresponded to  
430 pixels with red component higher than green value in RGB color space. The area of disease  
431 lesions was computed as the sum of pixels in the ‘lesion’ layer. The remaining pixels were  
432 attributed to the ‘leaf’ layer. Image analysis allowed the collection of lesion area values over  
433 time. Every kinetics was fitted by a polynomial regression. The latency time and lesion  
434 doubling time were extracted from the fit. The latency time was defined as the time needed  
435 to reach a lesion area of 300 pixels. The lesion doubling time was computed as the  
436 difference between the time when lesion area reached 600 pixels and the time when lesion  
437 area reached 300 pixels. Kinetics that exhibited excessive signal to noise ratio were  
438 automatically excluded from the analysis as follows: we excluded leaves of size <300 pixels  
439 and leaves with a maximum lesion size < the variance of lesion size during the latency period.  
440 About 3 leaves were excluded per Navatron representing <2.5% of all leaves.

441 **Analysis of polymorphisms and identification of candidate genes.** We used a dataset of  
442 214,000 SNPs on 1,196 *A. thaliana* accessions (Atwell et al., 2010; Horton et al., 2012) to  
443 search for non-synonymous mutations present in Lip-0 and Rubeshnoe accessions but not in  
444 Col-0, Nok-1, Shahdara and Rld-2. The functional consequences of SNPs were predicted  
445 automatically using a script derived from the BioPython library (Cock et al., 2009) provided  
446 as **Supplementary file 2**. For this, gene models from TAIR version 9 were used. Predictions  
447 were verified manually for the top candidates using ExPASy translate tool and  
448 <http://signal.salk.edu/atg1001/> genome browser.

449

#### 450 **Accession Numbers**

451 Arabidopsis Genome Initiative locus identifiers for the genes in this article are as follows:  
452 At5g44870 (*LAZ5*); AT5G17880 (*CSA1*).

453

#### 454 **Acknowledgements**

455 We are grateful to past and present members of the QIP lab for stimulating discussions and  
456 suggestions. This work was supported by a starting grant of the European Research Council  
457 (ERC-StG 336808 project VariWhim) to S.R. and the French Laboratory of Excellence project  
458 TULIP (ANR-10-LABX-41; ANR-11-IDEX-0002-02).



459

460 **REFERENCES**

461 **Araus JL, Cairns JE** (2014) Field high-throughput phenotyping: the new crop breeding  
462 frontier. *Trends Plant Sci* **19**: 52–61

463 **Atwell S, Huang YS, Vilhjálmsson BJ, Willems G, Horton M, Li Y, Meng D, Platt A, Tarone**  
464 **AM, Hu TT, et al** (2010) Genome-wide association study of 107 phenotypes in  
465 *Arabidopsis thaliana* inbred lines. *Nature* **465**: 627–631

466 **Badet T, Peyraud R, Mbengue M, Navaud O, Derbyshire M, Oliver RP, Barbacci A, Raffaele**  
467 **S** (2017a) Codon optimization underpins generalist parasitism in fungi. *Elife* **6**: e22472

468 **Badet T, Voisin D, Mbengue M, Barascud M, Sucher J, Sadon P, Balagué C, Roby D, Raffaele**  
469 **S** (2017b) Parallel evolution of the POQR prolyl oligo peptidase gene conferring plant  
470 quantitative disease resistance. *PLoS Genet* **13**: e1007143

471 **Baranowski P, Jedryczka M, Mazurek W, Babula-Skowronska D, Siedliska A, Kaczmarek J**  
472 (2015) Hyperspectral and Thermal Imaging of Oilseed Rape (*Brassica napus*) Response  
473 to Fungal Species of the Genus *Alternaria*. *PLoS One* **10**: e0122913

474 **Barbetti MJ, Banga SK, Fu TD, Li YC, Singh D, Liu SY, Ge XT, Banga SS** (2014) Comparative  
475 genotype reactions to *Sclerotinia sclerotiorum* within breeding populations of *Brassica*  
476 *napus* and *B. juncea* from India and China. *Euphytica* **197**: 47–59

477 **Benjamini Y, Hochberg Y** (1995) Controlling the False Discovery Rate: A Practical and  
478 Powerful Approach to Multiple Testing. *J R Stat Soc Ser B* **57**: 289–300

479 **Bolton MD, Thomma BPHJ, Nelson BD** (2006) *Sclerotinia sclerotiorum* (Lib.) de Bary: biology  
480 and molecular traits of a cosmopolitan pathogen. *Mol Plant Pathol* **7**: 1–16

481 **Chen D, Neumann K, Friedel S, Kilian B, Chen M, Altmann T, Klukas C** (2014) Dissecting the  
482 Phenotypic Components of Crop Plant Growth and Drought Responses Based on High-  
483 Throughput Image Analysis. *Plant Cell Online* **26**: 4636–4655

484 **Cock PJA, Antao T, Chang JT, Chapman BA, Cox CJ, Dalke A, Friedberg I, Hamelryck T, Kauff**  
485 **F, Wilczynski B, et al** (2009) Biopython: freely available Python tools for computational  
486 molecular biology and bioinformatics. *Bioinformatics* **25**: 1422–1423

487 **Coppens F, Wuyts N, Inzé D, Dhondt S** (2017) Unlocking the potential of plant phenotyping  
488 data through integration and data-driven approaches. *Curr Opin Syst Biol* **4**: 58–63

489 **Corwin JA, Copeland D, Feusier J, Subedy A, Eshbaugh R, Palmer C, Maloof J, Kliebenstein**  
490 **DJ** (2016) The Quantitative Basis of the *Arabidopsis* Innate Immune System to Endemic  
491 Pathogens Depends on Pathogen Genetics. *PLoS Genet* **12**: 1–29

492 **Corwin JA, Kliebenstein DJ** (2017) Quantitative Resistance: More than just perception of a  
493 pathogen. *Plant Cell* **29**: 655–665

494 **Czedik-Eysenberg A, Seitner S, Güldener U, Koemeda S, Jez J, Colombini M, Djamei A** (2018)

- 495 The 'PhenoBox', a flexible, automated, open-source plant phenotyping solution. *New*  
496 *Phytol.* doi: 10.1111/nph.15129
- 497 **Dallal Bashi Z, Hegedus DD, Buchwaldt L, Rimmer SR, Borhan MH** (2010) Expression and  
498 regulation of Sclerotinia sclerotiorum necrosis and ethylene-inducing peptides (NEPs).  
499 *Mol Plant Pathol* **11**: 43–53
- 500 **Debieu M, Huard-Chauveau C, Genissel A, Roux F, Roby D, Huard-Chauveau C, Genissel A,**  
501 **Roux F, Roby D** (2015) Quantitative Disease Resistance to the bacterial pathogen  
502 *Xanthomonas campestris* involves an Arabidopsis immune receptor pair and a gene of  
503 unknown function. *Mol Plant Pathol* **17**: 510–520
- 504 **Derbyshire M, Denton-Giles M, Hegedus D, Seifbarghi S, Rollins J, Kan JV, Seidl MF, Faino L,**  
505 **Mbengue M, Navaud O, et al** (2017) The complete genome sequence of the  
506 phytopathogenic fungus *Sclerotinia sclerotiorum* reveals insights into the genome  
507 architecture of broad host range pathogens. *Genome Biol Evol* **9**: 593–618
- 508 **Derbyshire MC, Denton-Giles M** (2016) The control of sclerotinia stem rot on oilseed rape  
509 (*Brassica napus*): current practices and future opportunities. *Plant Pathol* **65**: 859–877
- 510 **Dodds PN, Rathjen JP** (2010) Plant immunity: towards an integrated view of plant–pathogen  
511 interactions. *Nat Rev Genet* **11**: 539–548
- 512 **Doehlemann G, Requena N, Schaefer P, Brunner F, O'Connell R, Parker JE** (2014)  
513 Reprogramming of plant cells by filamentous plant-colonizing microbes. *New Phytol*  
514 **204**: 803–814
- 515 **Fahlgren N, Gehan MA, Baxter I** (2015) Lights, camera, action: high-throughput plant  
516 phenotyping is ready for a close-up. *Curr Opin Plant Biol* **24**: 93–99
- 517 **Faigón-Soverna A, Harmon FG, Storani L, Karayekov E, Staneloni RJ, Gassmann W, Más P,**  
518 **Casal JJ, Kay SA, Yanovsky MJ** (2006) A constitutive shade-avoidance mutant implicates  
519 TIR-NBS-LRR proteins in Arabidopsis photomorphogenic development. *Plant Cell* **18**:  
520 2919–28
- 521 **Faris JD, Zhang Z, Lu H, Lu S, Reddy L, Cloutier S, Fellers JP, Meinhardt SW, Rasmussen JB,**  
522 **Xu SS, et al** (2010) A unique wheat disease resistance-like gene governs effector-  
523 triggered susceptibility to necrotrophic pathogens. *Proc Natl Acad Sci U S A* **107**:  
524 13544–9
- 525 **Flor HH** (1956) The complementary genic systems in flax and flax rust. *Adv Genet* **8**: 29–54
- 526 **Friesen TL, Faris JD, Solomon PS, Oliver RP** (2008) Host specific toxins: effectors of  
527 necrotrophic pathogenicity. *Cell Microbiol* **10**: 1421–1428
- 528 **Fu D, Uauy C, Distelfeld A, Blechl A, Epstein L, Chen X, Sela H, Fahima T, Dubcovsky J** (2009)  
529 A kinase-START gene confers temperature-dependent resistance to wheat stripe rust.  
530 *Science (80- )* **323**: 1357–1360
- 531 **Gassmann W, Hinsch ME, Staskawicz BJ** (1999) The Arabidopsis RPS4 bacterial-resistance  
532 gene is a member of the TIR-NBS-LRR family of disease-resistance genes. *Plant J* **20**:

- 533 265–77
- 534 **Ge XT, Li YP, Wan ZJ, You MP, Finnegan PM, Banga SS, Sandhu PS, Garg H, Salisbury PA,**  
535 **Barbetti MJ** (2012) Delineation of *Sclerotinia sclerotiorum* pathotypes using differential  
536 resistance responses on *Brassica napus* and *B. juncea* genotypes enables identification  
537 of resistance to prevailing pathotypes. *F Crop Res* **127**: 248–258
- 538 **Govrin EM, Levine A** (2000) The hypersensitive response facilitates plant infection by the  
539 necrotrophic pathogen *Botrytis cinerea*. *Curr Biol* **10**: 751–757
- 540 **Horton MW, Hancock AM, Huang YS, Toomajian C, Atwell S, Auton A, Mulyati NW, Platt A,**  
541 **Sperone FG, Vilhjálmsson BJ, et al** (2012) Genome-wide patterns of genetic variation in  
542 worldwide *Arabidopsis thaliana* accessions from the RegMap panel. *Nat Genet* **44**:  
543 212–6
- 544 **Huard-Chauveau C, Perchepped L, Debieu M, Rivas S, Kroj T, Kars I, Bergelson J, Roux F,**  
545 **Roby D** (2013) An Atypical Kinase under Balancing Selection Confers Broad-Spectrum  
546 Disease Resistance in *Arabidopsis*. *PLoS Genet* **9**: e1003766
- 547 **Hurni S, Scheuermann D, Krattinger SG, Kessel B, Wicker T, Herren G, Fitze MN, Breen J,**  
548 **Presterl T, Ouzunova M, et al** (2015) The maize disease resistance gene *Htn1* against  
549 northern corn leaf blight encodes a wall-associated receptor-like kinase. *Proc Natl Acad*  
550 *Sci* **112**: 8780–8785
- 551 **Iakovidis M, Teixeira PJPL, Exposito-Alonso M, Cowper MG, Law TF, Liu Q, Vu MC, Dang TM,**  
552 **Corwin JA, Weigel D, et al** (2016) Effector Triggered Immune Response in *Arabidopsis*  
553 *thaliana* Is a Quantitative Trait. *Genetics* **204**: 337–353
- 554 **Kabbage M, Yarden O, Dickman MB** (2015) Pathogenic attributes of *Sclerotinia sclerotiorum*:  
555 switching from a biotrophic to necrotrophic lifestyle. *Plant Sci* **233**: 53–60
- 556 **Karisto P, Hund A, Yu K, Andereg J, Walter A, Mascher F, McDonald BA, Mikaberidze A**  
557 (2017) Ranking quantitative resistance to *Septoria tritici* blotch in elite wheat cultivars  
558 using automated image analysis. *Phytopathology* PHYTO-04-17-0163-R
- 559 **Krattinger SG, Lagudah ES, Spielmeier W, Singh RP, Huerta-Espino J, McFadden H,**  
560 **Bossolini E, Selter LL, Keller B** (2009) A Putative ABC Transporter Confers Durable  
561 Resistance to Multiple Fungal Pathogens in Wheat. *Science (80- )* **323**: 1360–1363
- 562 **Kulye M, Liu H, Zhang Y, Zeng H, Yang X, Qiu D** (2012) Hrip1, a novel protein elicitor from  
563 necrotrophic fungus, *Alternaria tenuissima*, elicits cell death, expression of defence-  
564 related genes and systemic acquired resistance in tobacco. *Plant, Cell Environ* **35**:  
565 2104–2120
- 566 **Lai Z, Wang F, Zheng Z, Fan B, Chen Z** (2011) A critical role of autophagy in plant resistance  
567 to necrotrophic fungal pathogens. *Plant J* **66**: 953–968
- 568 **Lee TG, Diers BW, Hudson ME** (2016) An efficient method for measuring copy number  
569 variation applied to improvement of nematode resistance in soybean. *Plant J* **88**: 143–  
570 153

- 571 **Lenarčič T, Albert I, Böhm H, Hodnik V, Pirc K, Zavec AB, Podobnik M, Pahovnik D, Žagar E,**  
572 **Pruitt R, et al** (2017) Eudicot plant-specific sphingolipids determine host selectivity of  
573 microbial NLP cytolysins. *Science* (80- ) **358**: 1431–1434
- 574 **Lenz HD, Haller E, Melzer E, Kober K, Wurster K, Stahl M, Bassham DC, Vierstra RD, Parker**  
575 **JE, Bautor J, et al** (2011) Autophagy differentially controls plant basal immunity to  
576 biotrophic and necrotrophic pathogens. *Plant J* **66**: 818–830
- 577 **Li Y, Kabbage M, Liu W, Dickman MB** (2016) Aspartyl protease mediated cleavage of AtBAG6  
578 is necessary for autophagy and fungal resistance in plants. *Plant Cell* TPC2015–00626–  
579 RA
- 580 **Liu G, Kennedy R, Greenshields DL, Peng G, Forseille L, Selvaraj G, Wei Y** (2007) Detached  
581 and attached Arabidopsis leaf assays reveal distinctive defense responses against  
582 hemibiotrophic *Colletotrichum* spp. *Mol Plant Microbe Interact* **20**: 1308–1319
- 583 **Liu Z, Zhang Z, Faris JD, Oliver RP, Syme R, Mcdonald MC, McDonald BA, Solomon PS, Lu S,**  
584 **Shelver WL, et al** (2012) The Cysteine Rich Necrotrophic Effector SnTox1 Produced by  
585 *Stagonospora nodorum* Triggers Susceptibility of Wheat Lines Harboring Snn1. *PLoS*  
586 *Pathog* **8**: e1002467
- 587 **Llorente F, Alonso-Blanco C, Sánchez-Rodríguez C, Jorda L, Molina A** (2005) ERECTA  
588 receptor-like kinase and heterotrimeric G protein from Arabidopsis are required for  
589 resistance to the necrotrophic fungus *Plectosphaerella cucumerina*. *Plant J* **43**: 165–80
- 590 **Lorang J, Kidarsa T, Bradford CS, Gilbert B, Curtis M, Tzeng SC, Maier CS, Wolpert TJ** (2012)  
591 Tricking the Guard: Exploiting Plant Defense for Disease Susceptibility. *Sci Signal* **338**:  
592 659
- 593 **Lorang JM, Sweat TA, Wolpert TJ** (2007) Plant disease susceptibility conferred by a  
594 “resistance” gene. *Proc Natl Acad Sci* **104**: 14861
- 595 **Magnin-Robert M, Le Bourse D, Markham JE, Dorey S, Clément C, baillieul fabienne,**  
596 **Dhondt-Cordelier S** (2015) Modifications of sphingolipid content affect tolerance to  
597 hemibiotrophic and necrotrophic pathogens by modulating plant defense responses in  
598 Arabidopsis. *Plant Physiol* **169**: pp.01126.2015
- 599 **Mbengue M, Navaud O, Peyraud R, Barascud M, Badet T, Vincent R, Barbacci A, Raffaele S**  
600 (2016) Emerging Trends in Molecular Interactions between Plants and the Broad Host  
601 Range Fungal Pathogens *Botrytis cinerea* and *Sclerotinia sclerotiorum*. *Front Plant Sci* **7**:  
602 422
- 603 **Moscou MJ, Lauter N, Steffenson B, Wise RP** (2011) Quantitative and qualitative stem rust  
604 resistance factors in barley are associated with transcriptional suppression of defense  
605 regulons. *PLoS Genet*. doi: 10.1371/journal.pgen.1002208
- 606 **Mur LAJ, Kenton P, Lloyd AJ, Ougham H, Prats E** (2008) The hypersensitive response; The  
607 centenary is upon us but how much do we know? *J Exp Bot* **59**: 501–520
- 608 **Mutka AM, Fentress SJ, Sher JW, Berry JC, Pretz C, Nusinow DA, Bart R** (2016) Quantitative,

- 609 image-based phenotyping methods provide insight into spatial and temporal  
610 dimensions of plant disease. *Plant Physiol* **172**: pp.00984.2016
- 611 **Nafisi M, Stranne M, Zhang L, van Kan JAL, Sakuragi Y** (2014) The Endo-Arabinanase BcAra1  
612 Is a Novel Host-Specific Virulence Factor of the Necrotic Fungal Phytopathogen *Botrytis*  
613 *cinerea*. *Mol Plant-Microbe Interact* **27**: 781–792
- 614 **Nelson JM, Hauser DA, Hinson R, Shaw AJ** (2018) A novel experimental system using the  
615 liverwort *Marchantia polymorpha* and its fungal endophytes reveals diverse and  
616 context-dependent effects. *New Phytol*. doi: 10.1111/nph.15012
- 617 **Oliver RP, Solomon PS** (2010) New developments in pathogenicity and virulence of  
618 necrotrophs. *Curr Opin Plant Biol* **13**: 415–419
- 619 **Palma K, Thorgrimsen S, Malinovsky FG, Fiil BK, Nielsen HB, Brodersen P, Hofius D,**  
620 **Petersen M, Mundy J** (2010) Autoimmunity in *Arabidopsis* *acd11* is mediated by  
621 epigenetic regulation of an immune receptor. *PLoS Pathog*. doi:  
622 10.1371/journal.ppat.1001137
- 623 **Peltier AJ, Bradley CA, Chilvers MI, Malvick DK, Mueller DS, Wise KA, Esker PD** (2012)  
624 Biology, yield loss and control of *Sclerotinia* stem rot of soybean. *J Integr Pest Manag* **3**:  
625 B1–B7
- 626 **Percepied L, Balagué C, Riou C, Claudel-Renard C, Rivière N, Grezes-Besset B, Roby D**  
627 (2010) Nitric oxide participates in the complex interplay of defense-related signaling  
628 pathways controlling disease resistance to *Sclerotinia sclerotiorum* in *Arabidopsis*  
629 *thaliana*. *Mol Plant-Microbe Interact* **23**: 846–860
- 630 **Poland JA, Balint-Kurti PJ, Wisser RJ, Pratt RC, Nelson RJ** (2009) Shades of gray: the world of  
631 quantitative disease resistance. *Trends Plant Sci* **14**: 21–29
- 632 **Poland JA, Bradbury PJ, Buckler ES, Nelson RJ** (2011) Genome-wide nested association  
633 mapping of quantitative resistance to northern leaf blight in maize. *Proc Natl Acad Sci*  
634 **108**: 6893–6898
- 635 **Lo Presti L, Lanver D, Schweizer G, Tanaka S, Liang L, Tollot M, Zuccaro A, Reissmann S,**  
636 **Kahmann R** (2015) Fungal Effectors and Plant Susceptibility. *Annu Rev Plant Biol* **66**:  
637 513–545
- 638 **R Core Team** (2014) R: a language and environment for statistical computing. *R A Lang*  
639 *Environ Stat Comput*. doi: {ISBN} 3-900051-07-0
- 640 **Rajarammohan S, Pradhan AK, Pental D, Kaur J** (2018) Genome-wide association mapping  
641 in *Arabidopsis* identifies novel genes underlying quantitative disease resistance to  
642 *Alternaria brassicae*. *Mol Plant Pathol* **19**: 1719–1732
- 643 **Roux F, Voisin D, Badet T, Balagué C, Barlet X, Huard-Chauveau C, Roby D, Raffaele S** (2014)  
644 Resistance to phytopathogens e tutti quanti: Placing plant quantitative disease  
645 resistance on the map. *Mol Plant Pathol* **15**: 427–432
- 646 **Schorneck S, Huitema E, Cano LM, Bozkurt TO, Oliva R, Van Damme M, Schwizer S,**

- 647 **Raffaele S, Chaparro-Garcia A, Farrer R, et al** (2009) Ten things to know about  
648 oomycete effectors. *Mol Plant Pathol*. doi: 10.1111/j.1364-3703.2009.00593.x
- 649 **Shi G, Zhang Z, Friesen TL, Raats D, Fahima T, Brueggeman RS, Lu S, Trick HN, Liu Z, Chao W,**  
650 **et al** (2016) The hijacking of a receptor kinase-driven pathway by a wheat fungal  
651 pathogen leads to disease. *Sci Adv* **2**: e1600822–e1600822
- 652 **Simanshu DK, Zhai X, Munch D, Hofius D, Markham JE, Bielawski J, Bielawska A, Malinina L,**  
653 **Molotkovsky JG, Mundy JW, et al** (2014) Arabidopsis Accelerated Cell Death 11, ACD11,  
654 Is a Ceramide-1-Phosphate Transfer Protein and Intermediary Regulator of  
655 Phytoceramide Levels. *Cell Rep* **6**: 388–399
- 656 **Tong M, Kotur T, Liang W, Vogelmann K, Kleine T, Leister D, Brieske C, Yang S, Lüdke D,**  
657 **Wiermer M, et al** (2017) E3 ligase SAUL1 serves as a positive regulator of PAMP-  
658 triggered immunity and its homeostasis is monitored by immune receptor SOC3. *New*  
659 *Phytol* **215**: 1516–1532
- 660 **Veronese P, Nakagami H, Bluhm B, Abuqamar S, Chen X, Salmeron J, Dietrich RA, Hirt H,**  
661 **Mengiste T** (2006) The Membrane-Anchored BOTRYTIS-INDUCED KINASE1 Plays  
662 Distinct Roles in Arabidopsis Resistance to Necrotrophic and Biotrophic Pathogens.  
663 *Plant Cell* **18**: 257–273
- 664 **Vleugels T, Baert J, Van Bockstaele E** (2013) Morphological and pathogenic characterization  
665 of genetically diverse *Sclerotinia* isolates from European red clover crops (*Trifolium*  
666 *pratense* L.). *J Phytopathol* **161**: 254–262
- 667 **van der Walt S, Schönberger JL, Nunez-Iglesias J, Boulogne F, Warner JD, Yager N, Guillard**  
668 **E, Yu T** (2014) scikit-image: image processing in Python. *PeerJ*. doi: 10.7717/peerj.453
- 669 **Wickham H** (2010) A Layered grammar of graphics. *J Comput Graph Stat*. doi:  
670 10.1198/jcgs.2009.07098
- 671 **Wolpert TJ, Lorang JM** (2016) Victoria Blight, defense turned upside down. *Physiol Mol Plant*  
672 *Pathol* **95**: 8–13
- 673 **Zhang W, Fraiture M, Kolb D, Loffelhardt B, Desaki Y, Boutrot FFG, Tor M, Zipfel C, Gust AA,**  
674 **Brunner F** (2013) Arabidopsis receptor-like protein30 and receptor-like kinase  
675 suppressor of BIR1-1/EVERSHED mediate innate immunity to necrotrophic fungi. *Plant*  
676 *Cell* **25**: 4227–4241
- 677 **Zhu W, Ronen M, Gur Y, Minz-dub A, Masrati G, Ben-Tal N, Savidor A, Sharon I, Eizner E,**  
678 **Valerius O, et al** (2017) BcXYG1 , a Secreted Xyloglucanase from *Botrytis cinerea* ,  
679 Triggers Both Cell Death and Plant Immune Responses 1. **175**: 438–456
- 680 **Zuo W, Chao Q, Zhang N, Ye J, Tan G, Li B, Xing Y, Zhang B, Liu H, Fengler KA, et al** (2015) A  
681 maize wall-associated kinase confers quantitative resistance to head smut. *Nat Genet*  
682 **47**: 151–157
- 683
